# Supplementary material
Source: publisher figshare collection journal article supplement (https://frontiersin.figshare.com/ndownloader/files/23721641)
Supplement: Supplementary file 1 [file 23721641]

## GULLS VULNERABILITY SURVEY

For information on the GULLS survey content and implementation please contact any of the following project collaborators:

|                                                                                                                   |                                                                                                                                                                                                                                                                                                                           |
|-------------------------------------------------------------------------------------------------------------------|---------------------------------------------------------------------------------------------------------------------------------------------------------------------------------------------------------------------------------------------------------------------------------------------------------------------------|
| <b>Australia</b><br>Dr Ingrid van Putten <a href="mailto:ingrid.vanputten@csiro.au">ingrid.vanputten@csiro.au</a> | <b>Madagascar</b><br>Professor Shankar Aswani <a href="mailto:S.Aswani@ru.ac.za">S.Aswani@ru.ac.za</a> and/or<br>Mr Willem Malherbe <a href="mailto:wilfredmalherbe@gmail.com">wilfredmalherbe@gmail.com</a>                                                                                                              |
| <b>Brazil</b><br>Professor Maria Gasalla <a href="mailto:mgasalla@usp.br">mgasalla@usp.br</a>                     | <b>Solomon Islands</b><br>Professor Shankar Aswani <a href="mailto:S.Aswani@ru.ac.za">S.Aswani@ru.ac.za</a> and/or<br>Mr Willem Malherbe <a href="mailto:wilfredmalherbe@gmail.com">wilfredmalherbe@gmail.com</a>                                                                                                         |
| <b>India</b><br>Dr Shyam. S. Salim <a href="mailto:shyam.icar@gmail.com">shyam.icar@gmail.com</a>                 | <b>South Africa</b><br>Professor Shankar Aswani <a href="mailto:S.Aswani@ru.ac.za">S.Aswani@ru.ac.za</a><br>For vulnerability analysis generally<br>Ms Louise Gammage <a href="mailto:Louisegammage@gmail.com">Louisegammage@gmail.com</a><br>For vulnerability of fishing communities on the south coast of South Africa |

**Please note** that when using this survey, for some question instructions will need to be given to skip proceeding questions where appropriate.

| Qtn Number | Australia | South Africa | India | Brazil | Other ... | Question         | Answer |
|------------|-----------|--------------|-------|--------|-----------|------------------|--------|
|            | ✓         | ✓            | ✓     | ✓      |           | Surveyor name(s) |        |
|            | ✓         | ✓            | ✓     | ✓      |           | Date             |        |
|            | ✓         | ✓            | ✓     | ✓      |           | Start time       |        |

### BASIC RESPONDENT DATA

|   |   |   |   |  |                   |               |
|---|---|---|---|--|-------------------|---------------|
| ✓ | ✓ | ✓ | ✓ |  | Respondent name   | (open answer) |
| ✓ | ✓ | ✓ | ✓ |  | House No/ address | (open answer) |
| ✓ | ✓ | ✓ | ✓ |  | Gender            | Male          |
|   |   |   |   |  |                   | Female        |
| ✓ | ✓ | ✓ | ✓ |  | Age               | (open answer) |

|  |   |   |   |   |                   |               |
|--|---|---|---|---|-------------------|---------------|
|  | x | ✓ | ✓ | ✓ | Village/Community | (open answer) |
|  | x | ✓ | x | X | First language    | (open answer) |
|  | x | ✓ | x | X | Race              | (open answer) |

### Fishing activity

|      |   |   |   |   |                                                                                                  |                                     |
|------|---|---|---|---|--------------------------------------------------------------------------------------------------|-------------------------------------|
| 1.1  | ✓ | ✓ | ✓ | ✓ | Is fishing your main occupation?                                                                 | Yes                                 |
|      |   |   |   |   |                                                                                                  | No                                  |
| 1.2  | ✓ | ✓ | ✓ | ✓ | How many days per week do you go fishing?                                                        | Every day of the week               |
|      |   |   |   |   |                                                                                                  | 3 to 5 days a week                  |
|      |   |   |   |   |                                                                                                  | 2 to 3 days a week                  |
|      |   |   |   |   |                                                                                                  | 1 to 2 days a week                  |
|      |   |   |   |   |                                                                                                  | Once a week                         |
|      |   |   |   |   |                                                                                                  | Less than once a week               |
| 1.3  | ✓ | ✓ | ✓ | ✓ | What is the average (typical) length of a fishing trip?                                          | Less than 1 hour                    |
|      |   |   |   |   |                                                                                                  | 1- 3 hours                          |
|      |   |   |   |   |                                                                                                  | 3-6 hours                           |
|      |   |   |   |   |                                                                                                  | One day                             |
|      |   |   |   |   |                                                                                                  | Two days                            |
|      |   |   |   |   |                                                                                                  | One week                            |
|      |   |   |   |   |                                                                                                  | More than one week                  |
| 1.4  | x | ✓ | ✓ | ✓ | What was your highest catch ever on a day of fishing and when was that                           | (Kilos - Year)                      |
| 1.5  | x | ✓ | ✓ | ✓ | What has been your best catch this year?                                                         | (Kilos)                             |
| 1.6  | x | ✓ | ✓ | ✓ | What is the average distance from the coast that you fish at now?                                | (meters - kilometres)               |
| 1.7  | x | ✓ | ✓ | ✓ | Has this average distance increased, decreased or not changed in the time you have been fishing? | Increased                           |
|      |   |   |   |   |                                                                                                  | Decreased                           |
|      |   |   |   |   |                                                                                                  | Not changed                         |
| 1.8  | ✓ | x | x | X | How much of your household income is derived from fishing?                                       | (\$ or % of total household income) |
| 1.9  | ✓ | x | x | X | What would you do if you were unable to make a living from fishing?                              | (open question)                     |
| 1.10 | ✓ | ✓ | ✓ | ✓ | List the three most important fish species you target for <b>commercial</b> purposes?            | (open question)                     |
| 1.11 |   |   |   |   | Have these top three species changed in the past five years?                                     | Yes                                 |
|      |   |   |   |   |                                                                                                  | No                                  |

## BASIC HOUSEHOLD DATA

### Household income

|     |   |   |   |   |                                                                                                                                                       |            |
|-----|---|---|---|---|-------------------------------------------------------------------------------------------------------------------------------------------------------|------------|
| 2.1 | ✓ | ✓ | ✓ | ✓ | Is there much variation in your household income between the summer and the winter period? (pre monsoon/ monsoon /post monsoon after the ban – India) | Yes        |
|     |   |   |   |   |                                                                                                                                                       | No         |
| 2.2 | ✓ | ✓ | ✓ | ✓ | What is your average household income per month before tax and from all sources?                                                                      | (\$/month) |

### Fishing business

|     |   |   |   |   |                                                                                |           |
|-----|---|---|---|---|--------------------------------------------------------------------------------|-----------|
| 3.1 | ✓ | ✓ | ✓ | ✓ | Do you own your own fishing business (the licences to go fishing)              | Yes       |
| 3.2 | ✓ | ✓ | ✓ | ✓ | How many people outside of family) did you employ over the last 12 months?     | (number)  |
| 3.3 | ✓ | ✓ | ✓ | ✓ | Approximately how much income does your fishing business turn over each month? | (\$/year) |

### Household expenditure

|     |   |   |   |   |                                                    |                            |
|-----|---|---|---|---|----------------------------------------------------|----------------------------|
| 4.1 | x | ✓ | ✓ | X | Where do you mainly go to buy your food purchases? | (Store and place)          |
| 4.2 | x | ✓ | x | ✓ | What percentage of foods are (by volume)           | Bought from the store .. % |
|     |   |   |   |   |                                                    | Exchanged .. %             |
|     |   |   |   |   |                                                    | Grown by yourself .. %     |
|     |   |   |   |   |                                                    | Total food 100 %           |

## SENSITIVITY

### Household dependence on marine resources

#### Social dependence (SD) on fishing

|     |   |   |   |   |                                                                                        |                               |
|-----|---|---|---|---|----------------------------------------------------------------------------------------|-------------------------------|
| 5.1 | ✓ | ✓ | ✓ | ✓ | I depend on the following institutions & people for day to day resources to go fishing | Weather predictions and news  |
|     |   |   |   |   |                                                                                        | Buyers of fish                |
|     |   |   |   |   |                                                                                        | My family                     |
|     |   |   |   |   |                                                                                        | Fellow workers                |
|     |   |   |   |   |                                                                                        | None                          |
| 5.2 | ✓ | ✓ | ✓ | ✓ | Who do you interact with when going fishing?                                           | Other fishers                 |
|     |   |   |   |   |                                                                                        | Suppliers fishing tackle/fuel |
|     |   |   |   |   |                                                                                        | Marine reserve managers       |
|     |   |   |   |   |                                                                                        | Safety authorities            |
|     |   |   |   |   |                                                                                        | Scientists                    |
|     |   |   |   |   |                                                                                        | Company officials             |

#### Economic dependence (ED) on fishing

|     |   |   |   |   |                                                                           | Food consumption |  |
|-----|---|---|---|---|---------------------------------------------------------------------------|------------------|--|
| 6.1 | ✓ | ✓ | ✓ | ✓ | How many days a week do you and your household consume fresh marine food? | (out of 7 days)  |  |
| 6.2 | x | ✓ | ✓ | ✓ | Is the fish you eat from your own catch of fish or do you buy fish?       | (open question)  |  |
| 6.3 | ✓ | ✓ | ✓ | ✓ | Which type of fish do you consume most often?                             | (open question)  |  |

### Economic dependence (ED) on other resources

|      |   |   |   |   |                                                                                  |                                                                  |
|------|---|---|---|---|----------------------------------------------------------------------------------|------------------------------------------------------------------|
| 7.1  | x | ✓ | x | ✓ | How many days a week do you and your household consume fresh vegetable products? | (out of 7 days)                                                  |
| 7.2  | x | ✓ | x | ✓ | How many days a week do you and your household consume fresh meat?               | (out of 7 days)                                                  |
| 7.3  | x | ✓ | ✓ | ✓ | What is the most important food source for your family's household?              | we grow it in the garden                                         |
|      |   |   |   |   |                                                                                  | we buy it in the local shop                                      |
|      |   |   |   |   |                                                                                  | we fish for food/a small portion from catch                      |
|      |   |   |   |   |                                                                                  | we collect our food from the bush/sea                            |
|      |   |   |   |   |                                                                                  | other                                                            |
| 7.4  | x | ✓ | x | ✓ | How do you pay for the goods you don't grow or catch yourself?                   | we exchange goods for it                                         |
|      |   |   |   |   |                                                                                  | we pay for it using cash                                         |
|      |   |   |   |   |                                                                                  | we obtain it on credit                                           |
|      |   |   |   |   |                                                                                  | other                                                            |
| 7.5  | x | ✓ | ✓ | ✓ | Do you have a garden or plantation?                                              | Yes                                                              |
|      |   |   |   |   |                                                                                  | No                                                               |
| 7.6  | x | ✓ | x | ✓ | If you grow food, why do you grow food                                           | I cannot afford to buy all my food (i.e. I have no other option) |
|      |   |   |   |   |                                                                                  | I could buy food but prefer to grow food to save money           |
|      |   |   |   |   |                                                                                  | I prefer fresh food                                              |
|      |   |   |   |   |                                                                                  | Other (explain)                                                  |
| 7.7  | x | ✓ | x | ✓ | How much of your crops are grown for commercial purposes                         | (out of 100%)                                                    |
| 7.8  | x | ✓ | x | ✓ | Where is your growing activity?                                                  | Close to household                                               |
|      |   |   |   |   |                                                                                  | Away from household                                              |
|      |   |   |   |   |                                                                                  | Other                                                            |
| 7.9  | x | ✓ | ✓ | ✓ | List the crops that you grow                                                     | (list)                                                           |
|      | x | ✓ | ✓ | ✓ | Do you have livestock?                                                           | Yes                                                              |
| 7.10 |   |   |   |   |                                                                                  | No                                                               |
| 7.11 | x | ✓ | ✓ | ✓ | Where is your livestock activity?                                                | Close to household                                               |
|      |   |   |   |   |                                                                                  | Away from household                                              |
|      |   |   |   |   |                                                                                  | Other                                                            |
| 7.12 | x | ✓ | ✓ | ✓ | List the livestock you own and numbers                                           | (list)                                                           |

### Historical & Cultural dependence (H&CD) on fishing

|     |   |   |   |   | Historical involvement                                               |         |
|-----|---|---|---|---|----------------------------------------------------------------------|---------|
| 8.1 | ✓ | ✓ | ✓ | ✓ | How long have you been a fisher?                                     | (years) |
| 8.2 | ✓ | ✓ | ✓ | ✓ | When did the fishery you are involved with begin in this area?       | (year)  |
| 8.3 | ✓ | ✓ | ✓ | ✓ | Were previous generations of your family/ancestors fishers?          | Yes     |
|     |   |   |   |   |                                                                      | No      |
| 8.4 | ✓ | ✓ | ✓ | ✓ | Which family relations were fishers in the past?                     | (list)  |
| 8.5 | ✓ | X | ✓ | X | Would you describe your family as having a fishing identity/culture? | Yes     |
|     |   |   |   |   |                                                                      | No      |
|     |   |   |   |   | Social mobility                                                      |         |
| 9.1 | ✓ | ✓ | ✓ | ✓ | What is/was the main occupation of your parents?                     | Father  |
|     |   |   |   |   |                                                                      | Mother  |
| 9.2 | ✓ | ✓ | ✓ | ✓ | Did your parents attend school?                                      | Father  |
|     |   |   |   |   |                                                                      | Mother  |
| 9.3 | ✓ | ✓ | ✓ | ✓ | To what level did your parents attend school?                        | Father  |
|     |   |   |   |   |                                                                      | Mother  |
| 9.4 | ✓ | ✓ | ✓ | ✓ | Did your parents own their own house?                                | Yes     |
|     |   |   |   |   |                                                                      | No      |
| 9.5 | ✓ | ✓ | ✓ | ✓ | Did your parents own their own boat?                                 | Yes     |
|     |   |   |   |   |                                                                      | No      |
| 9.6 | x | ✓ | x | ✓ | Would you say you are financially better off than your parents?      | Yes     |
|     |   |   |   |   |                                                                      | No      |

## ADAPTIVE CAPACITY

### Flexibility

#### Personal flexibility (PF)

|      |   |   |   |   |  |                                                                           |                               |
|------|---|---|---|---|--|---------------------------------------------------------------------------|-------------------------------|
| 10.1 | ✓ | ✓ | ✓ | ✓ |  | Right now, if you had a chance would you:                                 | Change your job               |
|      |   |   |   |   |  |                                                                           | Stay doing what you are doing |
| 10.2 | ✓ | ✓ | ✓ | ✓ |  | At this time do you feel you could find work in a different sector?       | Yes                           |
|      |   |   |   |   |  |                                                                           | No                            |
| 10.3 | ✓ | ✓ | ✓ | ✓ |  | How many options for a different type of job/work would you say you have? | Many options                  |
|      |   |   |   |   |  |                                                                           | Some options                  |
|      |   |   |   |   |  |                                                                           | Few options                   |
|      |   |   |   |   |  |                                                                           | No options                    |
| 10.4 | ✓ | ✓ | x | ✓ |  | Have you done any courses to improve your employability?                  | Yes                           |
|      |   |   |   |   |  |                                                                           | No                            |
| 10.5 | ✓ | ✓ | x | ✓ |  | If yes, what courses were they?                                           | (list)                        |
| 10.6 | ✓ | ✓ | ✓ | ✓ |  | Would you be happy working for someone else?                              | Yes                           |
|      |   |   |   |   |  |                                                                           | No                            |
| 10.6 | ✓ | ✓ | ✓ | ✓ |  | If so, why?                                                               | (list)                        |

#### Occupational flexibility (OF)

|      |   |   |   |   |  |                                                                                                        |                        |
|------|---|---|---|---|--|--------------------------------------------------------------------------------------------------------|------------------------|
| 11.1 | x | ✓ | ✓ | ✓ |  | Have you had a change of employment in the past 5 years?                                               | Yes                    |
|      |   |   |   |   |  |                                                                                                        | No                     |
| 11.2 | X | ✓ | ✓ | ✓ |  | If so, what was your previous occupation?                                                              | (list)                 |
| 11.3 | X | ✓ | ✓ | ✓ |  | Do you prefer your new occupation to your previous occupation?                                         | Yes                    |
|      |   |   |   |   |  |                                                                                                        | No                     |
| 11.4 | ✓ | ✓ | ✓ | ✓ |  | Would you be interested in doing a job other than fishing if you could earn as much as you do fishing? | Yes                    |
|      |   |   |   |   |  |                                                                                                        | No                     |
| 11.5 | ✓ | ✓ | x | x |  | List the factors that a new job must possess for you to take it (tick any that apply)                  | Adventure              |
|      |   |   |   |   |  |                                                                                                        | Flexibility            |
|      |   |   |   |   |  |                                                                                                        | Part time options      |
|      |   |   |   |   |  |                                                                                                        | Intellectual challenge |

|      |   |   |   |   |  |                                                                                                              |                                      |
|------|---|---|---|---|--|--------------------------------------------------------------------------------------------------------------|--------------------------------------|
|      |   |   |   |   |  |                                                                                                              | Personal safety                      |
|      |   |   |   |   |  |                                                                                                              | Low risk & Certain income            |
| 11.6 | ✓ | ✓ | ✓ | ✓ |  | List the alternative employment sectors that you would consider to take another job in (tick any that apply) | Tourism                              |
|      |   |   |   |   |  |                                                                                                              | Service industry                     |
|      |   |   |   |   |  |                                                                                                              | Aquaculture                          |
|      |   |   |   |   |  |                                                                                                              | Different fishing sector             |
|      |   |   |   |   |  |                                                                                                              | Office work                          |
|      |   |   |   |   |  |                                                                                                              | Mining                               |
|      |   |   |   |   |  |                                                                                                              | Masonry /Carpentry/Daily wage labour |
|      |   |   |   |   |  |                                                                                                              | Other                                |
| 11.7 | ✓ | ✓ | ✓ | ✓ |  | What do you see as the biggest risk to the fishing livelihoods in this community?                            | The market                           |
|      |   |   |   |   |  |                                                                                                              | Environmental change                 |
|      |   |   |   |   |  |                                                                                                              | Injury /Health                       |
|      |   |   |   |   |  |                                                                                                              | Management changes                   |
|      |   |   |   |   |  |                                                                                                              | Reduced fish abundance               |
|      |   |   |   |   |  |                                                                                                              | Other                                |
| 11.8 | x | ✓ | ✓ | ✓ |  | In which sector do people who have left fishing find work in this community?                                 | (list)                               |

### Institutional flexibility (IF)

|      |   |   |   |   |  |                                                                                                             |                             |
|------|---|---|---|---|--|-------------------------------------------------------------------------------------------------------------|-----------------------------|
|      |   |   |   |   |  | Markets                                                                                                     |                             |
| 12.1 | x | ✓ | ✓ | ✓ |  | How many markets are there in your community where you can <b>buy</b> fish?                                 | (number)                    |
| 12.2 | ✓ |   |   |   |  | AUSTRALIA VERSION : What proportion of your product do you sell directly to different market types such as: | Wholesalers: __%,           |
|      |   |   |   |   |  |                                                                                                             | Retailers: __%,             |
|      |   |   |   |   |  |                                                                                                             | Restaurants: __%,           |
|      |   |   |   |   |  |                                                                                                             | Members of the public: __%, |
|      |   |   |   |   |  |                                                                                                             | Other _____: __%            |
| 12.2 |   | ✓ | ✓ | ✓ |  | By which avenue do you <b>sell</b> your fish?                                                               | Wholesalers: __%,           |
|      |   |   |   |   |  |                                                                                                             | Local individual fish buyer |
|      |   |   |   |   |  |                                                                                                             | Large processor             |
|      |   |   |   |   |  |                                                                                                             | Directly off the boat       |
|      |   |   |   |   |  |                                                                                                             | Intermediary /middlemen     |
|      |   |   |   |   |  |                                                                                                             | Other                       |



|       |   |   |   |   |                                                                                                                    |                                                                                                        |
|-------|---|---|---|---|--------------------------------------------------------------------------------------------------------------------|--------------------------------------------------------------------------------------------------------|
| 12.3  | x | ✓ | ✓ | ✓ | If you sell through middlemen, how would you describe your relationship with middlemen in this community?          | (open question)                                                                                        |
| 12.4  | x | ✓ | x | ✓ | If NOT through middlemen, how would you describe your relationship with companies or buyers you sell your fish to? | (open question)                                                                                        |
| 12.5  | x | ✓ | ✓ | ✓ | How many markets/auction sites are there in your community where you can <b>sell</b> your fish directly?           | (number)                                                                                               |
| 12.6  | x | ✓ | x | ✓ | Do you ever sell goods to a fish market outside your community?                                                    | Yes                                                                                                    |
|       |   |   |   |   |                                                                                                                    | No                                                                                                     |
| 12.7  | x | ✓ | x | ✓ | How far is that market from your house?                                                                            | (km/ hours/min walking)                                                                                |
| 12.8  | ✓ | ✓ | x | ✓ | Are you fishing for orders from the markets?                                                                       | Yes                                                                                                    |
|       |   |   |   |   |                                                                                                                    | No                                                                                                     |
| 12.9  | ✓ | ✓ | ✓ | ✓ | Have fish prices been relatively stable over the past 3 years?                                                     | Yes                                                                                                    |
|       |   |   |   |   |                                                                                                                    | No                                                                                                     |
| 12.10 | ✓ | ✓ | ✓ | ✓ | What do you think dictates the price of fish most in the local market?                                             | The power of the middle men                                                                            |
|       |   |   |   |   |                                                                                                                    | The price the fisher demands                                                                           |
|       |   |   |   |   |                                                                                                                    | The quantity of the fish that is available that day                                                    |
|       |   |   |   |   |                                                                                                                    | Other                                                                                                  |
| 12.11 | x | ✓ | ✓ | ✓ | How many markets are there in your community where you can buy/sell fresh meat and vegetables?                     | (number)                                                                                               |
|       |   |   |   |   | Resource management institutions                                                                                   |                                                                                                        |
| 13.1  | ✓ | ✓ | ✓ | ✓ | Does your community have any type of marine resource management?                                                   | Yes                                                                                                    |
|       |   |   |   |   |                                                                                                                    | No                                                                                                     |
| 13.2  | ✓ | ✓ | ✓ | ✓ | If your community has marine resource management , what kind of management                                         | Traditional management; managed by chiefs/custom                                                       |
|       |   |   |   |   |                                                                                                                    | Community has agreed on a marine managed area or MPA                                                   |
|       |   |   |   |   |                                                                                                                    | Written management plan with a monitoring or decision making process and a committee that is in charge |
|       |   |   |   |   |                                                                                                                    | Government controlled management                                                                       |
|       |   |   |   |   |                                                                                                                    | Industry led management                                                                                |
|       |   |   |   |   |                                                                                                                    | Other                                                                                                  |
| 13.3  | ✓ | ✓ | ✓ | ✓ | Have rules, practices changed in the past in response to environmental changes?                                    | Yes                                                                                                    |
|       |   |   |   |   |                                                                                                                    | No                                                                                                     |

|      |   |   |   |   |                                                                                                |                 |
|------|---|---|---|---|------------------------------------------------------------------------------------------------|-----------------|
| 13.4 | x | ✓ | x | ✓ | How have the rules changed?                                                                    | (open question) |
| 13.5 | ✓ | ✓ | ✓ | ✓ | Do you have to report/record your catches at a landing site or to an authority?                | Yes             |
|      |   |   |   |   |                                                                                                | No              |
| 13.6 | ✓ | ✓ | ✓ | ✓ | To whom do you have to report?                                                                 | (open question) |
| 13.7 | ✓ | ✓ | ✓ | ✓ | List the three community organisations that are active in your village/town that come to mind? | (list)          |

## SENSITIVITY

### Household dependence on marine resources

#### Social dependence - Rating questions

|      |   |   |   |   | Attachment to place                                                                        |                   |                           |                             |                      |
|------|---|---|---|---|--------------------------------------------------------------------------------------------|-------------------|---------------------------|-----------------------------|----------------------|
| 14.1 | ✓ | ✓ | ✓ | ✓ | Would you say you feel like you belong or do not belong to this community/town?            | Strongly belong   | Belong                    | Slightly belong             | Not at all belong    |
| 14.2 | ✓ | X | x | X | How long do you plan to be a resident of this town?                                        | Rest of my life   | Many years                | A few years                 | Not long at all      |
| 14.3 | ✓ | X | x | X | How strong are the friendships you have in this town?                                      | Very strong       | Strong                    | Slightly strong             | Not strong at all    |
| 14.4 | ✓ | ✓ | ✓ | ✓ | How important are the friendships/relationships you have in this town?                     | Very important    | Important                 | Slightly important          | Not at all important |
| 14.5 | ✓ | X | x | X | How possible is it, if you need advice, to go to someone in your community?                | Very possible     | Possible                  | Slightly possible           | Not at all possible  |
| 14.6 | ✓ | X | x | X | How often do you socialise with people in your town/community?                             | Very often        | Somewhat often            | Rarely                      | Never                |
|      |   |   |   |   | Recreational dependence                                                                    |                   |                           |                             |                      |
| 15.1 | ✓ | X | x | X | How important is recreational fishing to your life?                                        | Very important    | Important                 | Slightly important          | Not at all important |
| 15.2 | ✓ | ✓ | x | ✓ | How often do you fish recreationally?                                                      | Very often        | Somewhat often            | Rarely                      | Never                |
|      |   |   |   |   | Attachment to fishing                                                                      |                   |                           |                             |                      |
| 16.1 | ✓ | X | ✓ | X | Would you say you fish just to earn a living or for pleasure as well?                      | Only for a living | Living more than pleasure | Pleasure more than a living | Only for pleasure    |
| 16.2 | ✓ | X | ✓ | X | Can you think of another job you would rather do than fishing?                             | Can think of many | Can think of some         | Can think of few            | Can think of none    |
| 16.3 | ✓ | X | ✓ | X | Would you say being independent is the worst thing or the best thing about being a fisher? | Best thing        | Good thing                | Bad thing                   | Worst thing          |
| 16.4 | ✓ | ✓ | ✓ | ✓ | How proud are you to tell people that you are a fisher?                                    | Very proud        | Proud                     | Slightly proud              | Not proud at all     |
| 16.5 | ✓ | X | ✓ | X | Would you say fishing for you is a lifestyle or just a job?                                | Lifestyle only    | More lifestyle than job   | More job than lifestyle     | Job only             |
| 16.6 | ✓ | ✓ | ✓ | ✓ | Would you like your children to continue in the fishing profession?                        | Like very much    | Like                      | Not like                    | Not like at all      |

**Economic Dependence– Rating questions**

|      |   |   |   |   | Economic dependence on fishing                                                                   |                 |                   |                    |                      |
|------|---|---|---|---|--------------------------------------------------------------------------------------------------|-----------------|-------------------|--------------------|----------------------|
| 17.1 | ✓ | x | ✓ | X | How likely is it you will have to sell your house if your fishing business fails?                | Very likely     | Somewhat likely   | Not likely         | Not likely at all    |
| 17.2 | ✓ | ✓ | ✓ | ✓ | How possible would it be to feed your family if you did not go fishing?                          | Highly possible | Possible          | Slightly possible  | Not at all possible  |
|      |   |   |   |   | Competition for fish                                                                             |                 |                   |                    |                      |
| 18.1 | x | ✓ | ✓ | ✓ | Would you say there are too many or too few fishers in the fishing industry in this community?   | Too many        | Slightly too many | Slightly too few   | Too few              |
| 18.2 | ✓ | ✓ | ✓ | ✓ | Would you say there are too many or too few fishers working in the areas you fish?               | Too many        | Slightly too many | Slightly too few   | Too few              |
| 18.3 | ✓ | ✓ | ✓ | ✓ | How concerned are you about the level of illegal fishing that is occurring?                      | Very concerned  | Concerned         | Slightly concerned | Not concerned at all |
| 18.4 | ✓ | x | x | x | Would you say illegal fishing is affecting or not affecting the catches of those who are honest? | Affects a lot   | Affects somewhat  | Not affecting much | Not affecting at all |
| 18.5 | ✓ | X | ✓ | X | Would you say your fish catches are higher or lower by the presence of industrial fishing?       | Much higher     | Higher            | Lower              | Much lower           |

### Historical & Cultural Dependence - Rating questions

|      |   |   |   |   | Cultural importance of fishing                                                                       |                 |             |                    |                      |
|------|---|---|---|---|------------------------------------------------------------------------------------------------------|-----------------|-------------|--------------------|----------------------|
| 19.1 | ✓ | ✓ | x | ✓ | How much was your local knowledge about fishing included in local natural resource management plans? | Very included   | Included    | Slightly included  | Not included at all  |
| 19.2 | ✓ | ✓ | ✓ | ✓ | How concerned are you by the lack of young people entering the fishing industry in your area?        | Very concerned  | Concerned   | Slightly concerned | Not concerned at all |
|      |   |   |   |   | Local ecological knowledge                                                                           |                 |             |                    |                      |
| 20.1 | ✓ | ✓ | ✓ | ✓ | How much do you think you know about the environment in which you fish?                              | A lot           | Quite a lot | A little           | Nothing              |
| 20.2 | ✓ | ✓ | ✓ | ✓ | How important do you think it is to pass on local knowledge about fishing to younger generations?    | Very important  | Important   | Slightly important | Not at all important |
| 20.3 | ✓ | ✓ | ✓ | ✓ | Would you say local knowledge about fishing is being lost or maintained in this community?           | Well maintained | Maintained  | Partly lost        | Almost all lost      |

## ADAPTIVE CAPACITY

### Flexibility

#### Personal flexibility - Rating questions

|      |   |   |   |   |                                                                                                                          |                    |                     |                      |                        |
|------|---|---|---|---|--------------------------------------------------------------------------------------------------------------------------|--------------------|---------------------|----------------------|------------------------|
|      |   |   |   |   | Perception of risk in approaching change                                                                                 |                    |                     |                      |                        |
| 21.1 | ✓ | ✓ | ✓ | ✓ | How used would you say you are to the changes in everyday life?                                                          | Very used to it    | Used to it          | Not used to it       | Not at all used to it  |
| 21.2 | ✓ | ✓ | x | ✓ | Would you say that only big companies or many fishing groups will survive future changes in the industry?                | All fishing groups | Many fishing groups | Some fishing groups  | Only big companies     |
|      |   |   |   |   | Ability to plan, learn and reorganise                                                                                    |                    |                     |                      |                        |
| 22.1 | ✓ | ✓ | ✓ | ✓ | How well have you planned for your financial security?                                                                   | Very well planned  | Well planned        | Planned a little     | No plan at all         |
| 22.2 | ✓ | ✓ | ✓ | ✓ | How interested are you in learning new skills outside of your area of expertise?                                         | Very interested    | Interested          | Slightly interested  | Not interested at all  |
| 22.3 | ✓ | x | ✓ | x | How often are you thinking of new and better ways to improve your fishing business/livelihood?                           | Very often         | Often               | Sometimes            | Never                  |
| 22.4 | ✓ | ✓ | x | ✓ | How possible is it for you to make a personal difference in improving the health of the marine environment in this area? | Very possible      | Possible            | Slightly possible    | Impossible             |
|      |   |   |   |   | Perception of the ability to cope with change                                                                            |                    |                     |                      |                        |
| 23.1 | ✓ | ✓ | x | ✓ | How confident are you that things will turn out well regardless of the changes and challenges you confront?              | Very confident     | Confident           | Slightly confident   | Not at all confident   |
| 23.2 | ✓ | x | x | x | Would you say that you do not believe or believe that the future will look after itself?                                 | Fully believe      | Believe             | Believe a little     | Do not believe at all  |
|      |   |   |   |   | Level of interest in adapting to change                                                                                  |                    |                     |                      |                        |
| 24.1 | ✓ | ✓ | ✓ | ✓ | How responsible do you feel to protect the marine environment?                                                           | Very responsible   | Responsible         | Slightly responsible | Not at all responsible |
|      |   |   |   |   | Attitude to change                                                                                                       |                    |                     |                      |                        |
| 25.1 | ✓ | x | x | x | How often do you volunteer (your time) to community activities?                                                          | Very often         | Often               | Sometimes            | Never                  |
| 25.2 | ✓ | ✓ | ✓ | ✓ | How likely are you to adapt to change compared to others you know?                                                       | Very likely        | Somewhat likely     | Not likely           | Not likely at all      |
|      |   |   |   |   | Employability                                                                                                            |                    |                     |                      |                        |
| 26.1 | ✓ | ✓ | ✓ | ✓ | How useful would your skills be in setting up a business other than in fishing?                                          | Very useful        | Useful              | Slightly useful      | Not at all useful      |

### Occupational flexibility- Rating questions

|      |   |   |   |   | Capacity to anticipate change and develop response strategies                                              |                  |             |                      |                        |
|------|---|---|---|---|------------------------------------------------------------------------------------------------------------|------------------|-------------|----------------------|------------------------|
| 27.1 | ✓ | ✓ | x | ✓ | How suitable do you think your community is for tourism activities?                                        | Very suitable    | Suitable    | Slightly suitable    | Not suitable at all    |
| 27.2 | ✓ | ✓ | x | ✓ | How healthy are the natural resources in your area for tourism?                                            | Very healthy     | Healthy     | Not very healthy     | Not at all healthy     |
| 27.3 | ✓ | ✓ | ✓ | ✓ | How important is fishing as an economic activity in this community?                                        | Very important   | Important   | Slightly important   | Not at all important   |
|      |   |   |   |   | Occupational mobility                                                                                      |                  |             |                      |                        |
| 28.1 | ✓ | ✓ | ✓ | ✓ | How often are you employed in more than one job per year?                                                  | Very often       | Often       | Sometimes            | Never                  |
| 28.2 | ✓ | ✓ | ✓ | ✓ | How willing are you to move to a bigger town or community for work if necessary?                           | Very willing     | willing     | Slightly willing     | Not willing at all     |
|      |   |   |   |   | Business approach                                                                                          |                  |             |                      |                        |
| 29.1 | ✓ | x | x | x | How comfortable are you making decisions (without much information) about potential changes in the future? | Very comfortable | Comfortable | Slightly comfortable | Not at all comfortable |
| 29.2 | ✓ | x | x | x | Would you say you always or never know how much money is coming in and out of your business?               | Always           | Often       | Sometimes            | Never                  |
| 29.3 | ✓ | x | ✓ | x | How often do you get professional advice before making a business decision?                                | Always           | Often       | Sometimes            | Never                  |
| 29.4 | ✓ | ✓ | ✓ | ✓ | How possible is it to guess how much money your business will make each month?                             | Very possible    | Possible    | Slightly possible    | Impossible             |
| 29.5 | ✓ | ✓ | x | ✓ | How detailed a business plan do you have for the following year?                                           | Very detailed    | Detailed    | Slightly detailed    | Not at all detailed    |
| 29.6 | ✓ | x | ✓ | x | How interested are you in learning new ways to improve your business skills?                               | Very interested  | Interested  | Slightly interested  | Not at all interested  |

### Institutional Flexibility- Rating questions

|      |   |   |   |   | Fishing compliance and conflict                                                                                                                   |                      |                 |                     |                       |
|------|---|---|---|---|---------------------------------------------------------------------------------------------------------------------------------------------------|----------------------|-----------------|---------------------|-----------------------|
| 30.1 | ✓ | ✓ | ✓ | ✓ | Would you say that illegal fishing does not occur or does occur in the community in which you fish?                                               | Occurs a lot         | Occurs          | Occurs a little     | Does not occur at all |
| 30.2 | ✓ | X | ✓ | X | Would you say that everyone or no-one obeys the rules the community sets?                                                                         | Everyone             | Most people     | A few people        | No-one                |
| 30.3 | ✓ | X | x | X | Would you say that everyone or no-one obeys the rules the official management organisations set for fishing in this community?                    | Everyone             | Most people     | A few people        | No-one                |
| 30.4 | ✓ | ✓ | ✓ | ✓ | Would you say that everyone or no-one knows who the individuals are that break the fishing rules?                                                 | Everyone             | Most people     | A few people        | No-one                |
| 30.5 | ✓ | ✓ | ✓ | ✓ | How well enforced are the fishing rules that apply in this area?                                                                                  | Well enforced        | Just enforced   | Enforced a little   | Not enforced at all   |
| 30.6 | ✓ | ✓ | ✓ | ✓ | How common are conflicts between fishers in this area?                                                                                            | Very common          | Common          | Not very common     | Do not occur ever     |
|      |   |   |   |   | Access to institutional safety nets & information                                                                                                 |                      |                 |                     |                       |
| 31.1 | ✓ | ✓ | ✓ | ✓ | Would you say there are none or many government safety nets in case disaster strikes fishing activities in this community?                        | Many                 | Some            | Few                 | None                  |
| 31.2 | ✓ | ✓ | ✓ | ✓ | How well linked is this community to government departments and/or academic institutions so you receive up to date information about fishing?     | Very well linked     | Well linked     | Linked slightly     | Not at all linked     |
| 31.3 | ✓ | X | x | X | How well integrated is this community into the academic institutions (universities and scientists) to get information on fishing related matters? | Very well integrated | Well integrated | Integrated slightly | Not at all integrated |
| 31.4 | ✓ | X | ✓ | X | Would you say that the government is or is not helping to overcome challenges the community faces in relation to marine resources?                | Helping a lot        | Some help       | Little help         | No help at all        |



### Attitude and perception - Rating questions

|      |   |   |   |   | Attitude to change                                                                                          |                         |                    |                           |                               |
|------|---|---|---|---|-------------------------------------------------------------------------------------------------------------|-------------------------|--------------------|---------------------------|-------------------------------|
| 32.1 | ✓ | ✓ | ✓ | ✓ | How much of a risk do you think environmental change poses to the community you live in?                    | High                    | Medium             | Low                       | None                          |
| 32.2 | ✓ | x | ✓ | X | How much of a risk do you think environmental change poses to your income and livelihood?                   | High                    | Medium             | Low                       | None                          |
| 32.3 | ✓ | ✓ | ✓ | ✓ | How anxious/scared do you feel about the changes you are seeing in the environment in your area?            | Very scared/<br>anxious | Scared/<br>anxious | Little scared/<br>anxious | Not at all scared/<br>anxious |
|      |   |   |   |   | Perceptions of change                                                                                       |                         |                    |                           |                               |
| 33.1 | ✓ | ✓ | ✓ | ✓ | How dangerous are changes in the local weather making fishing?                                              | Very dangerous          | Dangerous          | Slightly dangerous        | Not at all dangerous          |
| 33.2 | ✓ | ✓ | ✓ | ✓ | How difficult has it become to catch fish in the areas you fish?                                            | Very difficult          | Difficult          | Slightly difficult        | Not at all difficult          |
| 33.3 | ✓ | ✓ | x | ✓ | How many changes would you say you have noticed in the marine species you see?                              | Many changes            | Some changes       | Few changes               | No changes                    |
| 33.4 | ✓ | X | ✓ | X | How many areas that you fish are now depleted?                                                              | All areas               | Many areas         | Some areas                | No areas                      |
|      |   |   |   |   | Interest in the environment                                                                                 |                         |                    |                           |                               |
| 34.1 | ✓ | x | x | X | How environmentally sensitive would you say you are?                                                        | Very enviro sensitive   | Enviro sensitive   | Slightly enviro sensitive | Not at all enviro sensitive   |
| 34.2 | ✓ | X | x | X | How much would you like to learn about the 'sustainability of the fisheries resource'?                      | Like to learn a lot     | Like to learn      | Like to learn a little    | Not like to learn at all      |
| 34.3 | ✓ | ✓ | ✓ | ✓ | How many ideas would you say you have about how to ensure the sustainability of the main species you catch? | Many ideas              | Some ideas         | Few ideas                 | No ideas                      |
| 34.4 | ✓ | ✓ | x | ✓ | Would you say a good fisherman knows a lot or a little about the biology of the main species they catch?    | A lot                   | Some               | Little                    | Nothing                       |

## ADAPTIVE CAPACITY

### Social capital (SC)

| Social capital, networks and community cohesion |   |   |   |   |  |                                                                                            |                    |
|-------------------------------------------------|---|---|---|---|--|--------------------------------------------------------------------------------------------|--------------------|
| 35.1                                            | x | ✓ | ✓ | ✓ |  | When I need help financially or in terms of food or basic needs I ask for assistance from: | Family             |
|                                                 |   |   |   |   |  |                                                                                            | Friends            |
|                                                 |   |   |   |   |  |                                                                                            | Neighbours         |
|                                                 |   |   |   |   |  |                                                                                            | Local organisation |
|                                                 |   |   |   |   |  |                                                                                            | Take loans         |
|                                                 |   |   |   |   |  |                                                                                            | Other              |
| Gender equity                                   |   |   |   |   |  |                                                                                            |                    |
| 36.1                                            | ✓ | ✓ | ✓ | ✓ |  | Are any women in leadership roles in this community?                                       | Yes                |
|                                                 |   |   |   |   |  |                                                                                            | No                 |
|                                                 | ✓ | ✓ | ✓ | ✓ |  | What positions do women mostly hold?                                                       | (open question)    |

### Human capital (HC)

| Local knowledge |   |   |   |   |  |                                                                                                                                              |                        |
|-----------------|---|---|---|---|--|----------------------------------------------------------------------------------------------------------------------------------------------|------------------------|
| 37.1            | ✓ | ✓ | ✓ | ✓ |  | List the top three sources of information you regularly consult for information about local fishing and conditions?                          | (list)                 |
| Health          |   |   |   |   |  |                                                                                                                                              |                        |
| 38.1            | ✓ | ✓ | ✓ | ✓ |  | Do you have anyone in your house that is or was infirm or needed assistance to undertake daily chores in the past 12 months?                 | Yes                    |
|                 |   |   |   |   |  |                                                                                                                                              | No                     |
| 38.2            | ✓ | ✓ | ✓ | ✓ |  | Is anybody in your family chronically ill (was very sick for at least 3 months in the last year and could not work or do normal activities)? | Yes                    |
|                 |   |   |   |   |  |                                                                                                                                              | No                     |
| Education       |   |   |   |   |  |                                                                                                                                              |                        |
| 39.1            | ✓ | ✓ | ✓ | ✓ |  | What is the highest level of education reached by you                                                                                        | Primary school         |
|                 |   |   |   |   |  |                                                                                                                                              | Skills based education |
|                 |   |   |   |   |  |                                                                                                                                              | High school            |
|                 |   |   |   |   |  |                                                                                                                                              | University             |
|                 |   |   |   |   |  |                                                                                                                                              | Other                  |

| Skills    |   |   |   |   |  |                                                                             |                               |
|-----------|---|---|---|---|--|-----------------------------------------------------------------------------|-------------------------------|
| 40.1      | ✓ | ✓ | ✓ | ✓ |  | Do you have basic skill in any of the following fields                      | Gardening/horticulture        |
|           |   |   |   |   |  |                                                                             | Electronics                   |
|           |   |   |   |   |  |                                                                             | Mechanics (e.g. fixing a car) |
|           |   |   |   |   |  |                                                                             | Welding                       |
|           |   |   |   |   |  |                                                                             | Emergency first aid           |
|           |   |   |   |   |  |                                                                             | Other                         |
| Knowledge |   |   |   |   |  |                                                                             |                               |
| 41.1      | ✓ | ✓ | ✓ | ✓ |  | Do you feel you have basic knowledge in any of the following areas          | Local environmental issues    |
|           |   |   |   |   |  |                                                                             | Fish biology                  |
|           |   |   |   |   |  |                                                                             | Local marine issues           |
|           |   |   |   |   |  |                                                                             | Running a business            |
|           |   |   |   |   |  |                                                                             | Other                         |
| Labour    |   |   |   |   |  |                                                                             |                               |
| 42.1      | ✓ | ✓ | x | ✓ |  | Is it easy to find work outside of fishing if you are known to be a fisher? | Yes                           |
|           |   |   |   |   |  |                                                                             | No                            |
| 42.2      | ✓ | ✓ | ✓ | ✓ |  | List any community organisations you an active participant in?              | (list)                        |

## Financial capital (FC)

| Household sharing income |   |   |   |   |  |                                                                                                           |      |
|--------------------------|---|---|---|---|--|-----------------------------------------------------------------------------------------------------------|------|
| 43.1                     | x | ✓ | x | ✓ |  | Does each working household member contribute to basic household expenses (electricity, food, water etc)? | Yes  |
|                          |   |   |   |   |  |                                                                                                           | No   |
| 43.2                     | ✓ | ✓ | ✓ | ✓ |  | If you needed cash today for an emergency – would you be able to get that cash?                           | Yes  |
|                          |   |   |   |   |  |                                                                                                           | No   |
| Savings                  |   |   |   |   |  |                                                                                                           |      |
| 44.1                     | ✓ | ✓ | ✓ | ✓ |  | Do you have any savings or money put aside for emergencies?                                               | Yes  |
|                          |   |   |   |   |  |                                                                                                           | No   |
| Debt                     |   |   |   |   |  |                                                                                                           |      |
| 45.1                     | ✓ | ✓ | ✓ | ✓ |  | Do you have a mortgage on your house?                                                                     | Yes  |
|                          |   |   |   |   |  |                                                                                                           | No   |
| 45.2                     | ✓ | ✓ | ✓ | ✓ |  | How much?                                                                                                 | (\$) |
| 45.3                     | ✓ | ✓ | ✓ | ✓ |  | Do you owe money to anyone (aside from a mortgage on your house)?                                         | Yes  |
|                          |   |   |   |   |  |                                                                                                           | No   |

| Credit    |   |   |   |   |                                                    |                     |
|-----------|---|---|---|---|----------------------------------------------------|---------------------|
| 46.1      | x | ✓ | ✓ | X | Who/where do you normally borrow money from?       | Friends and family  |
|           |   |   |   |   |                                                    | Small money lenders |
|           |   |   |   |   |                                                    | Large companies     |
|           |   |   |   |   |                                                    | Banks               |
|           |   |   |   |   |                                                    | Other               |
| 46.2      | x | ✓ | ✓ | X | Have you loaned money to anyone in the last year?  | Yes                 |
|           |   |   |   |   |                                                    | No                  |
| Insurance |   |   |   |   |                                                    |                     |
| 47.1      | ✓ | ✓ | ✓ | ✓ | What insurance policies do you have at the moment? | Life                |
|           |   |   |   |   |                                                    | Contents            |
|           |   |   |   |   |                                                    | House               |
|           |   |   |   |   |                                                    | Vehicle             |
|           |   |   |   |   |                                                    | Income              |
|           |   |   |   |   |                                                    | Boat                |
|           |   |   |   |   |                                                    | Other               |

### Physical capital (PC)

| Built house |   |   |   |   |                                                       |                         |
|-------------|---|---|---|---|-------------------------------------------------------|-------------------------|
| 48.1        | ✓ | ✓ | ✓ | ✓ | Do you own or rent the house you live in?             | Own                     |
|             |   |   |   |   |                                                       | Rent                    |
|             |   |   |   |   |                                                       | Other                   |
| 48.2        | x | ✓ | ✓ | ✓ | Age of building?                                      | (years)                 |
| 48.3        | x | ✓ | ✓ | ✓ | Number of rooms                                       | (number)                |
| 48.4        | ✓ | ✓ | x | ✓ | Estimated value of main building:                     | (\$)                    |
| 48.5        | ✓ | ✓ | ✓ | ✓ | Does your house need much renovation and maintenance? | Yes                     |
|             |   |   |   |   |                                                       | No                      |
| 48.6        | x | ✓ | ✓ | ✓ | What is the outside of the house mainly made of?      | Concrete                |
|             |   |   |   |   |                                                       | Concrete block / bricks |
|             |   |   |   |   |                                                       | Wood                    |
|             |   |   |   |   |                                                       | Plywood                 |
|             |   |   |   |   |                                                       | Metal/tin               |
|             |   |   |   |   |                                                       | Thatch                  |
|             |   |   |   |   |                                                       | Coral/Lime              |
|             |   |   |   |   |                                                       | Other                   |

| Household assets  |   |   |   |   |  |                                                  |                           |
|-------------------|---|---|---|---|--|--------------------------------------------------|---------------------------|
| 49.1              | ✓ | ✓ | ✓ | ✓ |  | What sort of boat do you own?                    | I don't own a boat        |
|                   | X | X | ✓ | ✓ |  |                                                  | Fibre canoe               |
|                   |   | ✓ | x | ✓ |  |                                                  | Aluminium boat            |
|                   |   | ✓ | ✓ | ✓ |  |                                                  | Outboard Motor boat       |
|                   | X | X | ✓ | ✓ |  |                                                  | Dugout                    |
|                   | X | X | ✓ | ✓ |  |                                                  | Motorised dugout          |
|                   |   | ✓ | x |   |  |                                                  | Ski boat                  |
|                   |   | ✓ | ✓ | ✓ |  |                                                  | Motorized vessel          |
|                   |   | ✓ |   | ✓ |  |                                                  | Other (please specify)    |
| 49.2              |   |   |   |   |  | For each of the above indicate - Number of boats | (number)                  |
| 49.3              |   |   |   |   |  | For each of the above indicate - Size of boat    | (metres)                  |
| Freshwater supply |   |   |   |   |  |                                                  |                           |
| 50.1              | x | ✓ | ✓ | ✓ |  | Do you have a water tank?                        | Yes                       |
|                   |   |   |   |   |  |                                                  | No                        |
| 50.2              | ✓ | ✓ | ✓ | ✓ |  | What is your main source of drinking water       | Public system only        |
|                   |   |   |   |   |  |                                                  | Public & community system |
|                   |   |   |   |   |  |                                                  | Community system only     |
|                   |   |   |   |   |  |                                                  | Stand-pipe                |
|                   |   |   |   |   |  |                                                  | Bottled                   |
|                   |   |   |   |   |  |                                                  | Catchment, drums          |
|                   |   |   |   |   |  |                                                  | Well/ borehole            |
|                   |   |   |   |   |  |                                                  | Rain water tanks          |
|                   |   |   |   |   |  |                                                  | Spring/river              |
| Energy            |   |   |   |   |  |                                                  |                           |
| 51.1              | ✓ | ✓ | ✓ | ✓ |  | What is your main source of energy?              | Power is not connected    |
|                   |   |   |   |   |  |                                                  | Mains connected           |
|                   |   |   |   |   |  |                                                  | Solar panels              |
|                   |   |   |   |   |  |                                                  | Own generator             |
|                   |   |   |   |   |  |                                                  | Other power sources       |
| 51.2              | ✓ | ✓ | ✓ | ✓ |  | What source of water heating do you have?        | No water heating          |
|                   |   |   |   |   |  |                                                  | Gas                       |
|                   |   |   |   |   |  |                                                  | Solar                     |
|                   |   |   |   |   |  |                                                  | Electric                  |
|                   |   |   |   |   |  |                                                  | Firewood                  |

| Cooking fuels |                                     |                                     |                                     |                                     |  |                                                                       |
|---------------|-------------------------------------|-------------------------------------|-------------------------------------|-------------------------------------|--|-----------------------------------------------------------------------|
| 52.1          | <input checked="" type="checkbox"/> | <input checked="" type="checkbox"/> | <input checked="" type="checkbox"/> | <input checked="" type="checkbox"/> |  | What is the main source of fuels you use for cooking (tick only one)? |
|               |                                     |                                     |                                     |                                     |  | Firewood                                                              |
|               |                                     |                                     |                                     |                                     |  | Gas                                                                   |
|               |                                     |                                     |                                     |                                     |  | Other                                                                 |
|               |                                     |                                     |                                     |                                     |  | Electric                                                              |
| Waste         |                                     |                                     |                                     |                                     |  |                                                                       |
| 53.1          | <input checked="" type="checkbox"/> | <input checked="" type="checkbox"/> | <input checked="" type="checkbox"/> | <input checked="" type="checkbox"/> |  | Do you have your own toilet?                                          |
|               |                                     |                                     |                                     |                                     |  | Yes                                                                   |
|               |                                     |                                     |                                     |                                     |  | No                                                                    |
| 53.2          | <input checked="" type="checkbox"/> | <input checked="" type="checkbox"/> | <input checked="" type="checkbox"/> | <input checked="" type="checkbox"/> |  | What type of toilet do you have (tick only one)?                      |
|               |                                     |                                     |                                     |                                     |  | No toilet                                                             |
|               |                                     |                                     |                                     |                                     |  | Flush                                                                 |
|               |                                     |                                     |                                     |                                     |  | Pour flush                                                            |
|               |                                     |                                     |                                     |                                     |  | Long drop                                                             |
|               |                                     |                                     |                                     |                                     |  | Composting                                                            |
| 53.3          | <input checked="" type="checkbox"/> | <input checked="" type="checkbox"/> | <input checked="" type="checkbox"/> | <input checked="" type="checkbox"/> |  | What happens to waste water?                                          |
|               |                                     |                                     |                                     |                                     |  | Wastewater disposal                                                   |
|               |                                     |                                     |                                     |                                     |  | Waste water treatment                                                 |
|               |                                     |                                     |                                     |                                     |  | Septic tank                                                           |
|               |                                     |                                     |                                     |                                     |  | Soak pit                                                              |
|               |                                     |                                     |                                     |                                     |  | None                                                                  |
|               |                                     |                                     |                                     |                                     |  | Other                                                                 |
| 53.4          | <input checked="" type="checkbox"/> | <input checked="" type="checkbox"/> | <input checked="" type="checkbox"/> | <input checked="" type="checkbox"/> |  | How do you get rid of most of your rubbish?                           |
|               |                                     |                                     |                                     |                                     |  | Collected                                                             |
|               |                                     |                                     |                                     |                                     |  | Hole                                                                  |
|               |                                     |                                     |                                     |                                     |  | Open burning                                                          |
|               |                                     |                                     |                                     |                                     |  | Take it to the tip myself                                             |
|               |                                     |                                     |                                     |                                     |  | Dump outside                                                          |
|               |                                     |                                     |                                     |                                     |  | Other                                                                 |

## Natural capital (NC)

| Changing resource base |   |   |   |   |                                                                                              |                                 |
|------------------------|---|---|---|---|----------------------------------------------------------------------------------------------|---------------------------------|
| 54.1                   | ✓ | ✓ | ✓ | ✓ | Have you noticed changes in your communities' marine resources during your lifetime?         | Yes                             |
|                        |   |   |   |   |                                                                                              | No                              |
| 54.2                   | ✓ | ✓ | ✓ | ✓ | What do you believe is the main cause of these changes?                                      | (open question)                 |
| 54.3                   | ✓ | ✓ | ✓ | ✓ | Do you think that the sea habitat in your area is                                            | the same as it always was       |
|                        |   |   |   |   |                                                                                              | slightly damaged                |
|                        |   |   |   |   |                                                                                              | badly damaged                   |
|                        |   |   |   |   |                                                                                              | irrecoverably damaged           |
|                        |   |   |   |   |                                                                                              | improved since you were a child |
| 54.4                   | ✓ | ✓ | ✓ | ✓ | What do you think are the factors that cause declines in fish numbers in your area?          | (open question)                 |
| 54.5                   | ✓ | ✓ | ✓ | ✓ | What do you think could help to increase the number of fish in the sea in your area?         | (open question)                 |
| 54.6                   | ✓ | ✓ | ✓ | ✓ | Do you think your local marine resources are being over harvested at the moment?             | Yes                             |
|                        |   |   |   |   |                                                                                              | No                              |
| 54.7                   | ✓ | ✓ | ✓ | ✓ | Have you noticed any changes to your livelihood as a result of changes to the marine habitat | Yes                             |
|                        |   |   |   |   |                                                                                              | No                              |

## ADAPTIVE CAPACITY

### Social Capital - Rating questions

| Networks and social capital |   |   |   |   |                                                                                                                              |                |                  |                    |                      |
|-----------------------------|---|---|---|---|------------------------------------------------------------------------------------------------------------------------------|----------------|------------------|--------------------|----------------------|
| 55.1                        | ✓ | ✓ | ✓ | ✓ | How confident are you that you can call on someone (friend or family) if you need help financially?                          | Very confident | Confident        | Slightly confident | Not at all confident |
| Decision making             |   |   |   |   |                                                                                                                              |                |                  |                    |                      |
| 56.1                        | ✓ | ✓ | ✓ | ✓ | How involved are you in community decision making?                                                                           | Very involved  | Involved         | Slightly involved  | Not at all involved  |
| 56.2                        | ✓ | X | ✓ | X | How involved are you in regional decision making?                                                                            | Very involved  | Involved         | Slightly involved  | Not at all involved  |
| 56.3                        | ✓ | ✓ | X | ✓ | How involved are you in marine protected area management?                                                                    | Very involved  | Involved         | Slightly involved  | Not at all involved  |
| Leadership                  |   |   |   |   |                                                                                                                              |                |                  |                    |                      |
| 57.1                        | ✓ | ✓ | ✓ | ✓ | How strong is your community leadership?                                                                                     | Very strong    | Strong           | Slightly strong    | Not at all strong    |
| 57.2                        | ✓ | X | X | X | Would you say you trust the management of the community to do the right thing by the community?                              | Totally trust  | Trust a lot      | Trust a little     | Do not trust at all  |
| 57.3                        | ✓ | X | ✓ | X | Would you say you trust the community leaders to do the right thing by you?                                                  | Totally trust  | Trust a lot      | Trust a little     | Do not trust at all  |
| 57.4                        | ✓ | ✓ | ✓ | ✓ | How often can you talk to (have access to) a community leader if you need to?                                                | Always         | Often            | Sometimes          | Never                |
| Equity                      |   |   |   |   |                                                                                                                              |                |                  |                    |                      |
| 58.1                        | ✓ | ✓ | ✓ | ✓ | How equal is women's access and control over livelihoods and resources compared to men?                                      | Totally equal  | Nearly equal     | Quite unequal      | Not at all equal     |
| 58.2                        | ✓ | ✓ | ✓ | ✓ | Would you say that everyone in this community is vulnerable or are some people more vulnerable than others in the community? | Everyone       | Most people      | Some people        | No-one               |
| 58.3                        | ✓ | X | ✓ | X | How equal is access to resources in your community?                                                                          | Totally equal  | Slightly unequal | Very unequal       | Totally unequal      |



### Human Capital –Rating questions

| Skills |   |   |   |   |                                                                                                                                    |                |             |                    |                      |
|--------|---|---|---|---|------------------------------------------------------------------------------------------------------------------------------------|----------------|-------------|--------------------|----------------------|
| 59.1   | ✓ | ✓ | ✓ | ✓ | Would you say that, with the technology available to the industry now, that anyone or only certain people can be a skilful fisher? | Anyone         | Many people | Some people        | Very few people      |
| 59.2   | ✓ | ✓ | ✓ | ✓ | How confident are you that your skills will mean that you are successful in the industry?                                          | Very confident | Confident   | Slightly confident | Not at all confident |

### Financial Capital –Rating questions

|      |   |   |   |   |                                                                                                 |               |          |                   |                     |
|------|---|---|---|---|-------------------------------------------------------------------------------------------------|---------------|----------|-------------------|---------------------|
| 60.1 | ✓ | ✓ | ✓ | ✓ | How possible is it for you to endure some income shocks if it should occur?                     | Very possible | Possible | Slightly possible | Not at all possible |
| 60.2 | ✓ | ✓ | ✓ | ✓ | How possible is it for you to access financial reserves if you end up without work for a while? | Very possible | Possible | Slightly possible | Not at all possible |

### Physical Capital - Rating questions

|      |   |   |   |   |                                                                                                  |      |      |        |      |
|------|---|---|---|---|--------------------------------------------------------------------------------------------------|------|------|--------|------|
| 61.1 | ✓ | ✓ | ✓ | ✓ | How much money do you owe on your main assets (house – mode of transport)?                       | Much | Some | Little | None |
| 61.2 | ✓ | ✓ | ✓ | ✓ | How many of the things you own are in good condition and don't need to be replaced anytime soon? | All  | Most | Some   | None |

### Natural Capital– Rating questions

|      |   |   |   |   |                                                                          |                |          |          |                |
|------|---|---|---|---|--------------------------------------------------------------------------|----------------|----------|----------|----------------|
| 62.1 | ✓ | ✓ | ✓ | ✓ | How diverse (number of species) is the marine habitat of your community? | Very high      | High     | Low      | Very low       |
| 62.2 | ✓ | ✓ | ✓ | ✓ | How has the number of fish in the area changed compared to 5 years ago?  | Big increase   | Increase | Decrease | Big decrease   |
| 62.3 | ✓ | ✓ | ✓ | ✓ | Has the marine environment worsened or improved over the past 5 years?   | Improved a lot | Improved | Worsened | Worsened a lot |

## EXPOSURE (Ex)

### Exposure –Rating questions

|      |   |   |   |   |                                                                                           |            |            |           |          |
|------|---|---|---|---|-------------------------------------------------------------------------------------------|------------|------------|-----------|----------|
| 63.1 | ✓ | ✓ | x | ✓ | Would you say for safety reasons you prefer to work with many boats around whilst at sea? | Many boats | Some boats | Few boats | No boats |
|------|---|---|---|---|-------------------------------------------------------------------------------------------|------------|------------|-----------|----------|

## EXPOSURE (Ex)

| Environmental change |   |   |   |   |                                                                                                                               |                    |  |  |  |
|----------------------|---|---|---|---|-------------------------------------------------------------------------------------------------------------------------------|--------------------|--|--|--|
| 64                   | ✓ | ✓ | ✓ | ✓ | Indicate if you have noticed an increase or decrease in any of the following at sea in the past 5 years (tick any that apply) |                    |  |  |  |
| 64.1                 | ✓ | ✓ | ✓ | ✓ | Sea level                                                                                                                     |                    |  |  |  |
| 64.2                 | ✓ | ✓ | ✓ | ✓ | Rain                                                                                                                          |                    |  |  |  |
| 64.3                 | ✓ | ✓ | ✓ | ✓ | Wind                                                                                                                          |                    |  |  |  |
| 64.4                 | ✓ | ✓ | ✓ | ✓ | Air temp                                                                                                                      |                    |  |  |  |
| 64.5                 | ✓ | ✓ | ✓ | ✓ | Wave height                                                                                                                   |                    |  |  |  |
| 64.6                 | ✓ | ✓ | ✓ | ✓ | Current strength                                                                                                              |                    |  |  |  |
| 64.7                 | ✓ | ✓ | ✓ | ✓ | Rough seas                                                                                                                    |                    |  |  |  |
| 64.8                 | ✓ | ✓ | ✓ | ✓ | Sea temp                                                                                                                      |                    |  |  |  |
| 64.9                 | x | ✓ | x | ✓ | Bottom temp                                                                                                                   |                    |  |  |  |
| Personal exposure    |   |   |   |   |                                                                                                                               |                    |  |  |  |
| 65.1                 | ✓ | X | ✓ | x | Is your house in an area that is prone to flooding?                                                                           | Yes                |  |  |  |
|                      |   |   |   |   |                                                                                                                               | No                 |  |  |  |
| 65.2                 | ✓ | ✓ | ✓ | ✓ | How safe do you feel you are in your main occupation in the context of climatic exposure?                                     | Very safe          |  |  |  |
|                      |   |   |   |   |                                                                                                                               | Safe               |  |  |  |
|                      |   |   |   |   |                                                                                                                               | Somewhat dangerous |  |  |  |
|                      |   |   |   |   |                                                                                                                               | Dangerous          |  |  |  |
|                      |   |   |   |   |                                                                                                                               | Very dangerous     |  |  |  |
| Storms               |   |   |   |   |                                                                                                                               |                    |  |  |  |
| 66.1                 | ✓ | ✓ | ✓ | ✓ | Has there been a cyclone/large storm in the last 5 years in your area?                                                        | Yes                |  |  |  |
|                      |   |   |   |   |                                                                                                                               | No                 |  |  |  |
| 66.2                 | ✓ | ✓ | ✓ | ✓ | Were you directly impacted by the cyclone/large storm?                                                                        | Yes                |  |  |  |
|                      |   |   |   |   |                                                                                                                               | No                 |  |  |  |

|               |   |   |   |   |  |                                                                                      |                                                |
|---------------|---|---|---|---|--|--------------------------------------------------------------------------------------|------------------------------------------------|
| 66.3          | ✓ | ✓ | ✓ | ✓ |  | How bad was the cyclone/large storm damage to your household?                        | No damage                                      |
|               |   |   |   |   |  |                                                                                      | little damage                                  |
|               |   |   |   |   |  |                                                                                      | moderate damage                                |
|               |   |   |   |   |  |                                                                                      | major damage                                   |
|               |   |   |   |   |  |                                                                                      | Catastrophic (property damage & loss of lives) |
| 66.4          | ✓ | ✓ | ✓ | ✓ |  | Have actions been taken by the household to prevent cyclone/large storm damage?      | Yes                                            |
|               |   |   |   |   |  |                                                                                      | No                                             |
| 66.5          | ✓ | ✓ | ✓ | ✓ |  | What has been done to prevent damage?                                                | (open question)                                |
| 66.6          | X | ✓ | X | ✓ |  | How many fishing days did you lose due to the cyclone/large storms in the past year? | None                                           |
|               |   |   |   |   |  |                                                                                      | <10 days                                       |
|               |   |   |   |   |  |                                                                                      | 10-30 days                                     |
|               |   |   |   |   |  |                                                                                      | 1-3 months                                     |
|               |   |   |   |   |  |                                                                                      | >3 months                                      |
| <b>Floods</b> |   |   |   |   |  |                                                                                      |                                                |
| 67.1          | X | ✓ | ✓ | ✓ |  | Does your water source get dirty during heavy rains/flooding?                        | Yes                                            |
|               |   |   |   |   |  |                                                                                      | No                                             |
| 67.2          | ✓ | ✓ | ✓ | ✓ |  | Has there been a Flood in the last 5 years in your area?                             | Yes                                            |
|               |   |   |   |   |  | Yes (go to next 2 question) /No                                                      | No                                             |
| 67.3          | ✓ | ✓ | ✓ | ✓ |  | Were you directly impacted by the Flood?                                             | Yes                                            |
|               |   |   |   |   |  |                                                                                      | No                                             |
| 67.4          | ✓ | ✓ | ✓ | ✓ |  | How bad was the Flood damage to your household?                                      | No damage                                      |
|               |   |   |   |   |  |                                                                                      | little damage                                  |
|               |   |   |   |   |  |                                                                                      | moderate damage                                |
|               |   |   |   |   |  |                                                                                      | major damage                                   |
|               |   |   |   |   |  |                                                                                      | Catastrophic (property damage & loss of lives) |
| 67.5          | ✓ | ✓ | ✓ | ✓ |  | Have actions been taken by the household to prevent Flood damage?                    | Yes                                            |
|               |   |   |   |   |  |                                                                                      | No                                             |
| 67.6          | ✓ | ✓ | ✓ | ✓ |  | What has been done to prevent damage?                                                | (open question)                                |
| 67.7          | X | ✓ | X | ✓ |  | How many fishing days did you lose due to the Flood in the past year?                | None                                           |
|               |   |   |   |   |  |                                                                                      | <10 days                                       |
|               |   |   |   |   |  |                                                                                      | 10-30 days                                     |
|               |   |   |   |   |  |                                                                                      | 1-3 months                                     |

|                   |   |   |   |   |  |                                                                                      |                                                |
|-------------------|---|---|---|---|--|--------------------------------------------------------------------------------------|------------------------------------------------|
|                   |   |   |   |   |  |                                                                                      | >3 months                                      |
| Drought           |   |   |   |   |  |                                                                                      |                                                |
| 68.1              | ✓ | ✓ | ✓ | ✓ |  | Has there been a Drought in the last 5 years in your area?                           | Yes                                            |
|                   |   |   |   |   |  |                                                                                      | No                                             |
| 68.2              | ✓ | ✓ | ✓ | ✓ |  | Were you directly impacted by the Drought?                                           | Yes                                            |
|                   |   |   |   |   |  |                                                                                      | No                                             |
| 68.3              | ✓ | ✓ | ✓ | ✓ |  | How bad was the Drought damage to your household?                                    | No damage                                      |
|                   |   |   |   |   |  |                                                                                      | little damage                                  |
|                   |   |   |   |   |  |                                                                                      | moderate damage                                |
|                   |   |   |   |   |  |                                                                                      | major damage                                   |
|                   |   |   |   |   |  |                                                                                      | Catastrophic (property damage & loss of lives) |
| 68.4              | ✓ | ✓ | ✓ | ✓ |  | Have actions been taken by the household to prevent Drought damage?                  | Yes                                            |
|                   |   |   |   |   |  |                                                                                      | No                                             |
| 68.5              | ✓ | ✓ | ✓ | ✓ |  | What has been done to prevent damage?                                                | (open question)                                |
| 68.6              | X | ✓ | X | ✓ |  | How many fishing days did you lose due to the Drought in the past year?              | None                                           |
|                   |   |   |   |   |  |                                                                                      | <10 days                                       |
|                   |   |   |   |   |  |                                                                                      | 10-30 days                                     |
|                   |   |   |   |   |  |                                                                                      | 1-3 months                                     |
|                   |   |   |   |   |  |                                                                                      | >3 months                                      |
| Shoreline changes |   |   |   |   |  |                                                                                      |                                                |
| 69.1              | ✓ | ✓ | ✓ | ✓ |  | Has the shoreline in your village/area changed over the years?                       | Yes                                            |
|                   |   |   |   |   |  |                                                                                      | No                                             |
| 69.2              | ✓ | ✓ | ✓ | ✓ |  | Have you noticed places in your area where the shoreline has been eroded by the sea? | Yes                                            |
|                   |   |   |   |   |  |                                                                                      | No                                             |
| 69.3              | ✓ | ✓ | ✓ | ✓ |  | How much of the beach has eroded in the last 5 years?                                | None                                           |
|                   |   |   |   |   |  |                                                                                      | little                                         |
|                   |   |   |   |   |  |                                                                                      | moderate                                       |
|                   |   |   |   |   |  |                                                                                      | big damage                                     |
|                   |   |   |   |   |  |                                                                                      | houses/trees falling down                      |
| 69.4              | ✓ | ✓ | X | ✓ |  | Have you noticed any changes to your livelihood as a result of shoreline erosion?    | Yes                                            |
|                   |   |   |   |   |  |                                                                                      | No                                             |

## ADAPTATION OPTIONS (AdOp)

|                             |   |   |   |   |                                                                                                                                   |                 |
|-----------------------------|---|---|---|---|-----------------------------------------------------------------------------------------------------------------------------------|-----------------|
| 70.1                        | ✓ | ✓ | ✓ | ✓ | What will you do if weather conditions continue to worsen or change?                                                              | (open question) |
| 70.2                        | ✓ | ✓ | ✓ | ✓ | What will you do if it becomes too difficult to find enough fish?                                                                 | (open question) |
| 70.3                        | ✓ | ✓ | ✓ | ✓ | What would you do in the event of a 50% decline in fish catches?                                                                  | (open question) |
| 70.4                        | ✓ | ✓ | ✓ | ✓ | What would you do in the event of market prices dropping by 50% and remaining there?                                              | (open question) |
| 70.5                        | ✓ | ✓ | ✓ | ✓ | If you were in charge of the fishing activity in this area what would you do? (2 or 3 changes)                                    | (list)          |
| Climate change institutions |   |   |   |   |                                                                                                                                   |                 |
| 71.1                        | ✓ | ✓ | ✓ | ✓ | Are there institutions or government departments working on climate change or facilitating adaptation to change in the community? | Yes             |
|                             |   |   |   |   |                                                                                                                                   | No              |
| 71.2                        | x | ✓ | ✓ | ✓ | Which institutions work on climate change or facilitating adaptation?                                                             | (list)          |
| 71.3                        | ✓ | x | ✓ | x | Do you know of any programs/ projects or other work focused on climate change in the community?                                   | Yes             |
|                             |   |   |   |   |                                                                                                                                   | No              |

## ATTITUDE AND PERCEPTIONS OF CLIMATE CHANGE

|      |   |   |   |   |                                                                                      |                       |
|------|---|---|---|---|--------------------------------------------------------------------------------------|-----------------------|
| 72.1 | ✓ | ✓ | ✓ | ✓ | Have you ever heard of climate change?                                               | Yes                   |
|      |   |   |   |   |                                                                                      | No                    |
| 72.2 | ✓ | ✓ | ✓ | ✓ | Do you think the climate has changed over time?                                      | Yes                   |
|      |   |   |   |   |                                                                                      | No                    |
| 72.3 | ✓ | ✓ | ✓ | ✓ | List the top 3 changes in the climate you have noticed?                              | (list)                |
| 72.4 | ✓ | ✓ | ✓ | ✓ | Where do you mainly get your information about climate change? (tick any that apply) | Newspapers            |
|      |   |   |   |   |                                                                                      | TV/Radio              |
|      |   |   |   |   |                                                                                      | My friends and family |
|      |   |   |   |   |                                                                                      | The internet          |
|      |   |   |   |   |                                                                                      | Academic society      |
|      |   |   |   |   |                                                                                      | Other                 |



## DETAILED HOUSEHOLD DATA

### General household expenses

| Qtn Number | Aus | SA | India | Brazil | W/O | Approximately how much of your household expenses are on the following categories? |                    |
|------------|-----|----|-------|--------|-----|------------------------------------------------------------------------------------|--------------------|
|            |     |    |       |        |     | Expense                                                                            | \$/week/month/year |
| 73.1       | ✓   | ✓  | ✓     | ✓      |     | Rent                                                                               |                    |
| 73.2       | ✓   | ✓  | ✓     | ✓      |     | Food                                                                               |                    |
| 73.3       | ✓   | ✓  | ✓     | ✓      |     | Water                                                                              |                    |
| 73.4       | ✓   | ✓  | ✓     | ✓      |     | Electricity                                                                        |                    |
| 73.5       | ✓   | ✓  | ✓     | ✓      |     | School fees                                                                        |                    |
| 73.6       | ✓   | ✓  | ✓     | ✓      |     | Loan repayments                                                                    |                    |
| 73.7       | ✓   | ✓  | ✓     | ✓      |     | Insurances                                                                         |                    |

### General household items

| Qtn Number | Aus | SA | India | Brazil | W/O | Do you own the following? |        |
|------------|-----|----|-------|--------|-----|---------------------------|--------|
|            |     |    |       |        |     | Item                      | Yes/No |
| 74.1       | X   | ✓  | ✓     | ✓      |     | Vehicle                   |        |
| 74.2       |     |    |       |        |     | Fishing gear              |        |
| 74.3       |     |    |       |        |     | Television                |        |
| 74.4       |     |    |       |        |     | Gas or electric stove     |        |
| 74.5       |     |    |       |        |     | Cell phones               |        |
| 74.6       |     |    |       |        |     | Piped water               |        |
| 74.7       |     |    |       |        |     | Refrigerator              |        |
| 74.8       |     |    |       |        |     | Radio/ cassette player    |        |
| 74.9       |     |    |       |        |     | Video/ DVD player         |        |
| 74.10      |     |    |       |        |     | Generator                 |        |
| 74.11      |     |    |       |        |     | Electricity               |        |
| 74.12      |     |    |       |        |     | Washing machine           |        |
| 74.13      |     |    |       |        |     | Kerosene lamps            |        |
| 74.14      |     |    |       |        |     | Electric lamps            |        |
| 74.15      |     |    |       |        |     | Solar panel               |        |
| 74.16      |     |    |       |        |     | Garden/power tools        |        |

### Household data (start with eldest)

| Unique person number | Name | Relation to House Hold | M/F | Age | Marital status | Formal education | Ethnicity | Currently attending school? | Religion | Live/work elsewhere in the past 5 years (76.1) |
|----------------------|------|------------------------|-----|-----|----------------|------------------|-----------|-----------------------------|----------|------------------------------------------------|
|                      |      |                        |     |     |                |                  |           |                             |          |                                                |
|                      |      |                        |     |     |                |                  |           |                             |          |                                                |
|                      |      |                        |     |     |                |                  |           |                             |          |                                                |

### Livelihoods (for Adults >15)

| Unique person number (from above) | List different livelihood activities and sources of income | Days/ week spent on each activity | Livelihood level (Primary, secondary etc) | Formal or informal sector |
|-----------------------------------|------------------------------------------------------------|-----------------------------------|-------------------------------------------|---------------------------|
|                                   |                                                            |                                   |                                           |                           |
|                                   |                                                            |                                   |                                           |                           |
|                                   |                                                            |                                   |                                           |                           |

### Total income per household per month

| Unique person number (from above) | Income per month (cash) | If remittances: Amount of money received per month | Government grants: amount received per month/ year |
|-----------------------------------|-------------------------|----------------------------------------------------|----------------------------------------------------|
|                                   |                         |                                                    |                                                    |
|                                   |                         |                                                    |                                                    |
|                                   |                         |                                                    |                                                    |

### Condition of the house

To be filled out by researcher in process of doing interview

### Current condition of building and roof (tick box):

| Qtn # | House aspect       | Excellent | Good | Fair | Bad |
|-------|--------------------|-----------|------|------|-----|
| 77.1  | Roof condition     |           |      |      |     |
| 77.2  | Building condition |           |      |      |     |



## Community Infrastructure

Indicate if the following infrastructure items are present or absent in the community

| Infrastructure               | Present | Absent |
|------------------------------|---------|--------|
| Hospital                     |         |        |
| Medical clinic               |         |        |
| Doctor                       |         |        |
| Dentist                      |         |        |
| Pharmacy                     |         |        |
| Primary school               |         |        |
| Secondary school             |         |        |
| Piped water                  |         |        |
| Sewer                        |         |        |
| Sewage treatment             |         |        |
| Septic tanks                 |         |        |
| Electricity service          |         |        |
| Phone service                |         |        |
| Food market                  |         |        |
| Hotel                        |         |        |
| Restaurant                   |         |        |
| Guesthouse                   |         |        |
| Dive shops                   |         |        |
| Surf shops                   |         |        |
| Motorbike/ bicycle hire      |         |        |
| Curio and craft shops        |         |        |
| Petrol station               |         |        |
| Diesel mechanic              |         |        |
| Fish processor               |         |        |
| Banking facilities           |         |        |
| Paved road                   |         |        |
| Slipway                      |         |        |
| Tsunami early warning system |         |        |
| Flood warnings               |         |        |
| Lighthouses                  |         |        |
| Public transportation        |         |        |
| Recreational boating jetty   |         |        |
| Marine safety facility       |         |        |
| Others                       |         |        |
